# Supplementary material for: An interlaboratory comparison to quantify oxidative potential measurement in aerosol particles: challenges and recommendations for harmonisation
Source: Copernicus journal article supplement (doi:10.5194/amt-2024-107), 2024-07-24
Supplement: Supplementary file 1 [file amt-2024-107-supplement.pdf]

1 *Supplementary material of*

2

3

4 **An interlaboratory comparison to quantify oxidative potential**  
5 **measurement in aerosol particles: challenges and**  
6 **recommendations for harmonisation**

7

8

9 *Dominutti et al.,*

## SI-1 Simplified DTT RI-URBANS Protocol «Evaluation of acellular oxidative potential of particles by dithiothreitol (DTT) assay»

### Method 1 – OP DTT assay using plate readers

Before the absorbance measurements of the samples, perform a calibration of your analytical device using a DTT calibration curve for a concentration range between 0 and 60  $\mu\text{M}$  (titration with 1mM DTNB and reading of TNB formation at 412 nm) and report the results on the Excel file provided.

#### Reagents:

##### **Preparation of potassium phosphate (0.1M) buffer solution at pH 7.4**

Weight 13.41 g of dipotassium phosphate ( $\text{K}_2\text{HPO}_4$ , CAS [7758-11-4]) and 3.13 g of potassium dihydrogen phosphate ( $\text{KH}_2\text{PO}_4$ , CAS [7778-77-0]) and mix them in a volumetric flask of 1000 mL with ultra-pure MilliQ water. Check the pH using a pH meter reading equal to  $7.4 \pm 0.1$

##### **Preparation of DTT mother solution (8.3 mM)**

Weight 38.6 mg of 1,4-Dithiothreitol (DTT, CAS [3483-12-3]) and add 30 ml of the potassium phosphate buffer solution (7.4 pH). Keep the solution under an ice bath or in the fridge until use.

1.

##### **2. Preparation of DTT daughter solution (0.25 mM)**

This solution is obtained from 1.20 mL of the 8.3 mM DTT solution and completed to a final volume of 40 ml with potassium phosphate buffer solution (7.4 pH). Keep the solution under an ice bath or in the fridge until use.

3.

##### **4. Preparation of Dinitrothiobenzoic acid (DTNB) mother solution (10 mM)**

Weight 118.8 mg of 5,5'-Dithiobis (2-nitrobenzoic acid) (DTNB, CAS [69-78-3]) and add 30 ml of the potassium phosphate buffer solution (7.4 pH). Keep the solution under an ice bath or in the fridge until use.

##### **5. Preparation of DTNB daughter solution (1 mM)**

This solution is obtained by diluting 4mL of the 10mM DTNB solution, completing a total volume of 40 mL with the potassium phosphate buffer solution (7.4 pH). Keep the solution under an ice bath or in the fridge until use.

##### **6. Particulate Matter suspension solutions to be tested - samples**

Solution SP1  $5.0 \mu\text{g mL}^{-1}$ , solution SP2  $25 \mu\text{g mL}^{-1}$ , Solution SP3  $25 \mu\text{g mL}^{-1}$ , solution SP4  $25 \mu\text{g mL}^{-1}$ .

#### Material

One transparent 96-wells plate is sufficient to process all the samples in triplicate. You can use a separate 96-wells for the calibration curve of DTT.

The samples need to be under agitation during the experiment time at  $37.4^\circ\text{C}$ .

An ice bath is required to keep the DTT and DTNB cold (at least keep the reagent solution fresh in the freezer until use)

59 **Procedure for plate readers automatically injected**

60 **DTT Exposure and DTNB analysis:**

61 **Set up the temperature of the plate reader at 37,4°C for the duration of the assay.**

- 62
- 63 1. Draw up a grid for 96-wells plate, and locate the samples SP1 to SP4 as in the table below,
- 64 leaving the first 3x4 wells for the control<sub>ox</sub> (inherent DTT background oxidation).
- 65

|   | 1                     | 2                     | 3                     | 4   | 5   | 6   | 7   | 8   | 9   | 10  | 11  | 12  |      |
|---|-----------------------|-----------------------|-----------------------|-----|-----|-----|-----|-----|-----|-----|-----|-----|------|
| A | Control <sub>ox</sub> | Control <sub>ox</sub> | Control <sub>ox</sub> | SP1 | SP1 | SP1 | SP2 | SP2 | SP2 | SP3 | SP3 | SP3 | T=0  |
| B | Control <sub>ox</sub> | Control <sub>ox</sub> | Control <sub>ox</sub> | SP1 | SP1 | SP1 | SP2 | SP2 | SP2 | SP3 | SP3 | SP3 | T=10 |
| C | Control <sub>ox</sub> | Control <sub>ox</sub> | Control <sub>ox</sub> | SP1 | SP1 | SP1 | SP2 | SP2 | SP2 | SP3 | SP3 | SP3 | T=20 |
| D | Control <sub>ox</sub> | Control <sub>ox</sub> | Control <sub>ox</sub> | SP1 | SP1 | SP1 | SP2 | SP2 | SP2 | SP3 | SP3 | SP3 | T=30 |
| E | SP4                   | SP4                   | SP4                   |     |     |     |     |     |     |     |     |     | T=0  |
| F | SP4                   | SP4                   | SP4                   |     |     |     |     |     |     |     |     |     | T=10 |
| G | SP4                   | SP4                   | SP4                   |     |     |     |     |     |     |     |     |     | T=20 |
| H | SP4                   | SP4                   | SP4                   |     |     |     |     |     |     |     |     |     | T=30 |

- 66
- 67 2. Place 20  $\mu\text{L}$  of samples SP1 to SP4 into each well and 20  $\mu\text{L}$  of ultrapure water in Control<sub>ox</sub> wells.
- 68 3. Add 220  $\mu\text{L}$  of the potassium phosphate buffer solution (7.4 pH) in the sample wells SP1 to SP4
- 69 and in the control wells
- 70 4. Set up the plate reader at 37,4°C.
- 71 5. Place the plate into the reader and incubate for 10 minutes.
- 72 6. Shake the plate by the instrument for one minute.
- 73 7. **Read the intrinsic absorbance** of the samples/control at 412 nm.
- 74 8. At T= 0 min, program the injector A to dispense 50  $\mu\text{L}$  of 0.25 mM DTT in ALL wells. Keep the
- 75 solution under an ice bath or in the fridge until use.
- 76 9. At T=0 min, program injector B to dispense 50  $\mu\text{L}$  of 1 mM DTNB into the T=0 wells (lines A and
- 77 E). Keep the solution under an ice bath or in the fridge until use.
- 78 10. Shake the plate by the reader for 30 seconds every minute for 10 minutes.
- 79 11. At T=10 minutes, dispense 50  $\mu\text{L}$  of 1 mM DTNB into the T=10 wells (lines B and F) to stop the
- 80 DTT consumption reaction by the samples.
- 81 12. Shake the plate by the device for 30 seconds every minute for 10 minutes.
- 82 13. At T=20 minutes, dispense 50  $\mu\text{L}$  of 1 mM DTNB into the T=20 wells (lines C and G).
- 83 14. Shake the plate by the device for 30 seconds every minute for 10 minutes.
- 84 15. At T=30 minutes, dispense 50  $\mu\text{L}$  of 1 mM DTNB into the T=30 wells (lines D and H).
- 85 16. Shake the plate for 60 seconds, wait 10 seconds and read the final absorbance at **412 nm**. The
- 86 yellow compound (TNB) formed is stable for two hours; only one final absorbance measurement
- 87 is necessary.
- 88 17. Calculate the kinetics of the DTT oxidation as:
- 89 - nmol DTT  $\text{min}^{-1}$  is obtained by **subtracting both** the intrinsic absorption of each sample (to
- 90 remove a potential matrix effect between samples, the value obtained in step 8) **and** the
- 91 inherent DTT auto-oxidation rate (slope of Control<sub>ox</sub> sample) **from** the DTT consumption rate in
- 92 the presence of particles (SP1-4).
- 93 - nmol DTT  $\text{min}^{-1} \mu\text{g}^{-1}$  is obtained by subtracting both the intrinsic absorption of each sample and
- 94 inherent DTT auto-oxidation rate from the DTT consumption rate in the presence of particles
- 95 and dividing it by the mass of particulate matter in the reaction.
- 96 - % DTT consumed  $\mu\text{g}^{-1} \text{min}^{-1}$  is obtained by the % of DTT lost over the reaction with samples
- 97 relative to the inherent DTT auto-oxidation and normalised by the reaction time and per  $\mu\text{g}$  of
- 98 PM.
- 99 All these formulae are pre-included in the Excel spreadsheet provided.

100 Use it to add the results using your participant reference number, the analytical protocol and  
101 instrument used and the reference number for each sample.

102  
103 Once you have reported results for the DTT simplified protocol, feel free to test the samples  
104 with your own protocols, filling the other tabs of the Excel file.

105  
106  
107

#### **Procedure for plate readers without injectors**

108 **DTT Exposure and DTNB analysis:**

109 **Set up the temperature of the plate reader at 37.4°C for the duration of the assay.**

110  
111  
112  
113  
114  
115  
116  
117  
118  
119  
120  
121  
122  
123  
124  
125  
126  
127  
128  
129  
130  
131  
132  
133  
134  
135  
136  
137  
138

1. Draw up a grid for 96-wells plate, and locate the samples SP1 to SP4 as in the table above, leaving the first 3x4 wells for the control sample (inherent DTT background oxidation).
2. Place 20  $\mu\text{L}$  of samples SP1 to SP4 into each well and 20  $\mu\text{L}$  of ultrapure water in Control<sub>ox</sub> wells.
3. Add 220  $\mu\text{L}$  of the potassium phosphate buffer solution (7.4 pH) in the sample wells SP1 to SP5 and in the control sample wells.
4. Introduce the plate into the reader and read the intrinsic absorbance of the solutions at 412 nm.
5. Inject 50  $\mu\text{L}$  of 1mM DTNB into the T=0 min wells (lines A and E) (this is done to avoid depletion of DTT with samples at t=0 with manual injection, which is slower than injectors). Keep the DTNB solution under an ice bath or in the fridge until use.
6. Dispense 50  $\mu\text{L}$  of 0.25 mM DTT in ALL wells. Keep the DTT solution under an ice bath or in the fridge until use.
7. Set up the plate reader at 37.4 °C.
8. Introduce the plate into the plate reader and incubate for 10 mins.
9. Shake the plate by the device for 30 seconds every minute for 10 minutes.
10. At T=10 minutes, remove the plate from the instrument and inject 50  $\mu\text{L}$  of 1mM DTNB into the T=10 wells (lines B and F) to stop the DTT consumption reaction by the samples.
11. Place the plate back on the reader and stir it for 30 seconds every minute for 10 minutes.
12. At T=20 minutes, remove the plate from the reader and inject 50  $\mu\text{L}$  of 1mM DTNB into the T=20 wells (lines C and G).
13. Place the plate back on the reader and shake it for 30 seconds every minute for 10 minutes.
14. At T=30 minutes, remove the plate from the reader and dispense 50  $\mu\text{L}$  of 1mM DTNB into the T=30 wells (lines D and H).
15. Place the plate back into the reader and shake it for 60 seconds, wait 10 seconds and read the final absorbance at **412 nm**. The yellow compound (TNB) formed is stable for two hours; only one final absorbance measurement is necessary.
18. Calculate the kinetics of the DTT oxidation as:

- 139 - nmol DTT  $\text{min}^{-1}$  is obtained by **subtracting both** the intrinsic absorption of each sample (to  
140 remove a potential matrix effect, value obtained in step 8) **and** the inherent DTT auto-oxidation  
141 rate of the blank (slope of Control<sub>ox</sub> sample) **from** the DTT consumption rate in the presence of  
142 particles (SP1-4).
- 143 - nmol DTT  $\text{min}^{-1} \mu\text{g}^{-1}$  is obtained by subtracting both the intrinsic absorption of each sample and  
144 inherent DTT auto-oxidation rate from the DTT consumption rate in the presence of particles  
145 and dividing it by the mass of particulate matter in the reaction.
- 146 - % DTT consumed  $\mu\text{g}^{-1} \text{min}^{-1}$  is obtained by the % of DTT lost over the reaction with samples  
147 relative to the inherent DTT auto-oxidation and normalised by the reaction time and per  $\mu\text{g}$  of  
148 PM.

149 All these formulae are pre-included in the Excel spreadsheet provided.

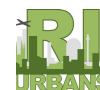

*Simplified DTT RI-Urbans Protocol – CNRS*

- 150            Use it to add the results using your participant reference number, the analytical protocol and
- 151            instrument used and the reference number for each sample.
- 152
- 153            Once you have reported results for the DTT simplified protocol, feel free to test the samples
- 154            with your own protocols, filling the other tabs of the excel file.

155

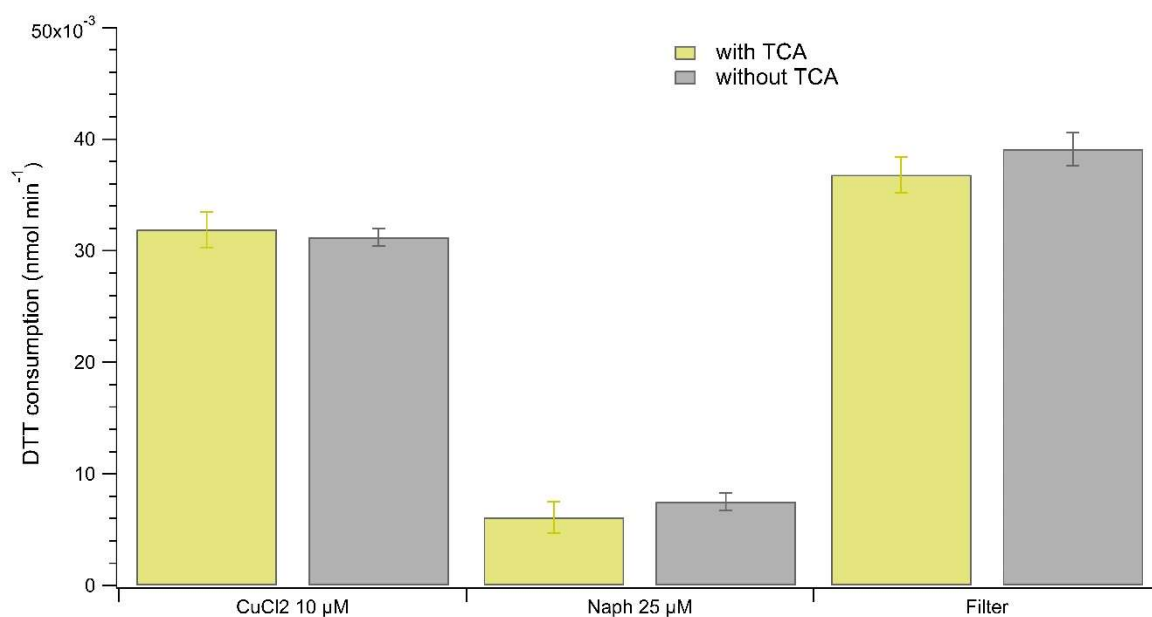

156

157 *Figure S1. The effect of trichloroacetic acid (TCA; used for quenching the DTT reaction mixture) on the measured*  
158 *OP DTT values (in nmol min<sup>-1</sup>). The experiments were conducted using CuCl<sub>2</sub> (10 μM), 1,4-naphthoquinone (Naph;*  
159 *25 μM), and aqueous extracts of ambient PM samples (filter).*

160

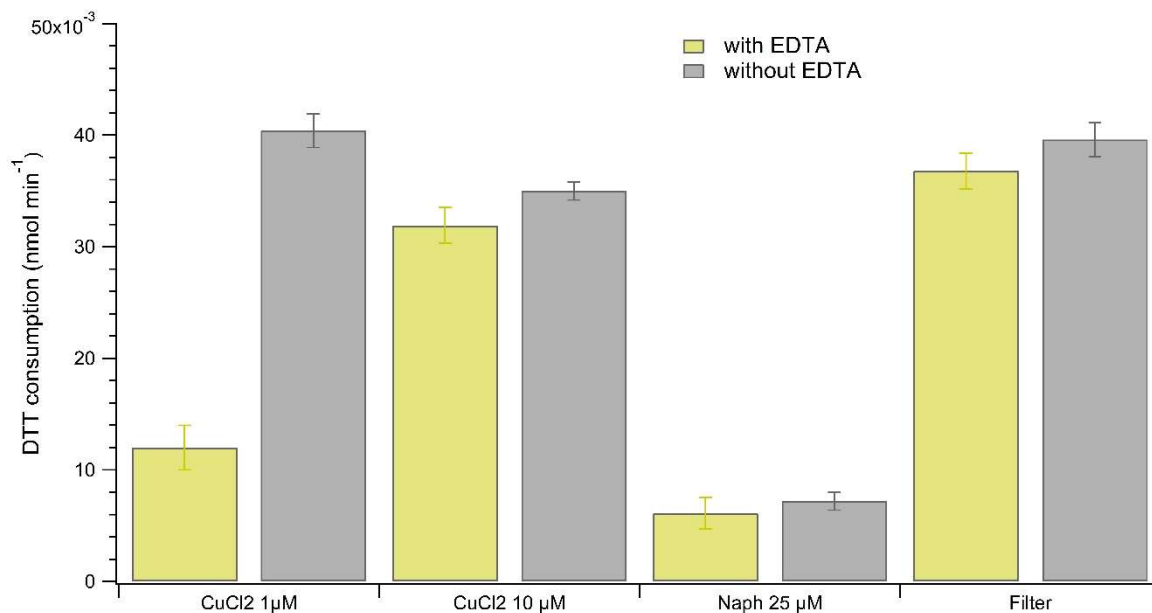

161

162 *Figure S2. The average effect and standard deviation of EDTA (used for buffer purification) on the measured OP*  
163 *DTT values (in nmol min<sup>-1</sup>). The experiments were conducted using CuCl<sub>2</sub> (1 μM and 10 μM), 1,4-naphthoquinone*  
164 *(Naph; 25 μM), and aqueous extracts of ambient PM samples (filter).*

165

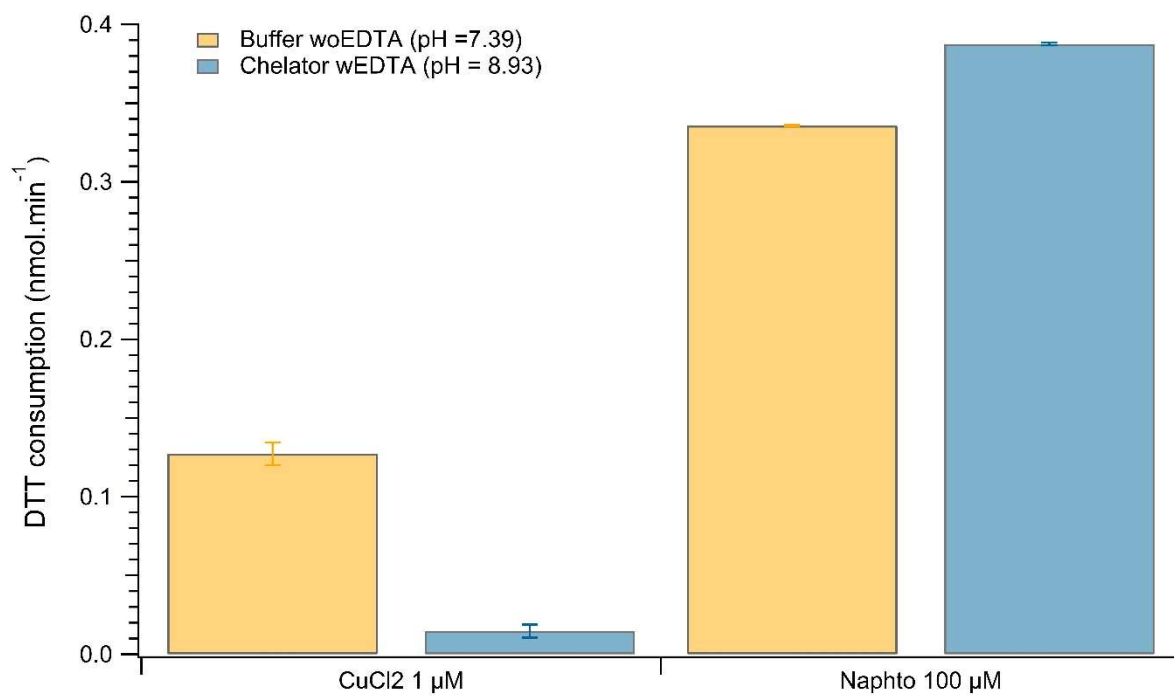

166

167 *Figure S3. Comparison of the average effect and standard deviation of potassium phosphate buffer (pH= 7.4)*  
 168 *without EDTA (yellow bars) and the Tris-HCl buffer with EDTA (pH= 8.9) on the measured OP DTT values (in nmol*  
 169 *min<sup>-1</sup>). The experiments were conducted using CuCl<sub>2</sub> (1 μM), and 1,4-naphthoquinone (Naph; 100 μM) samples.*

170

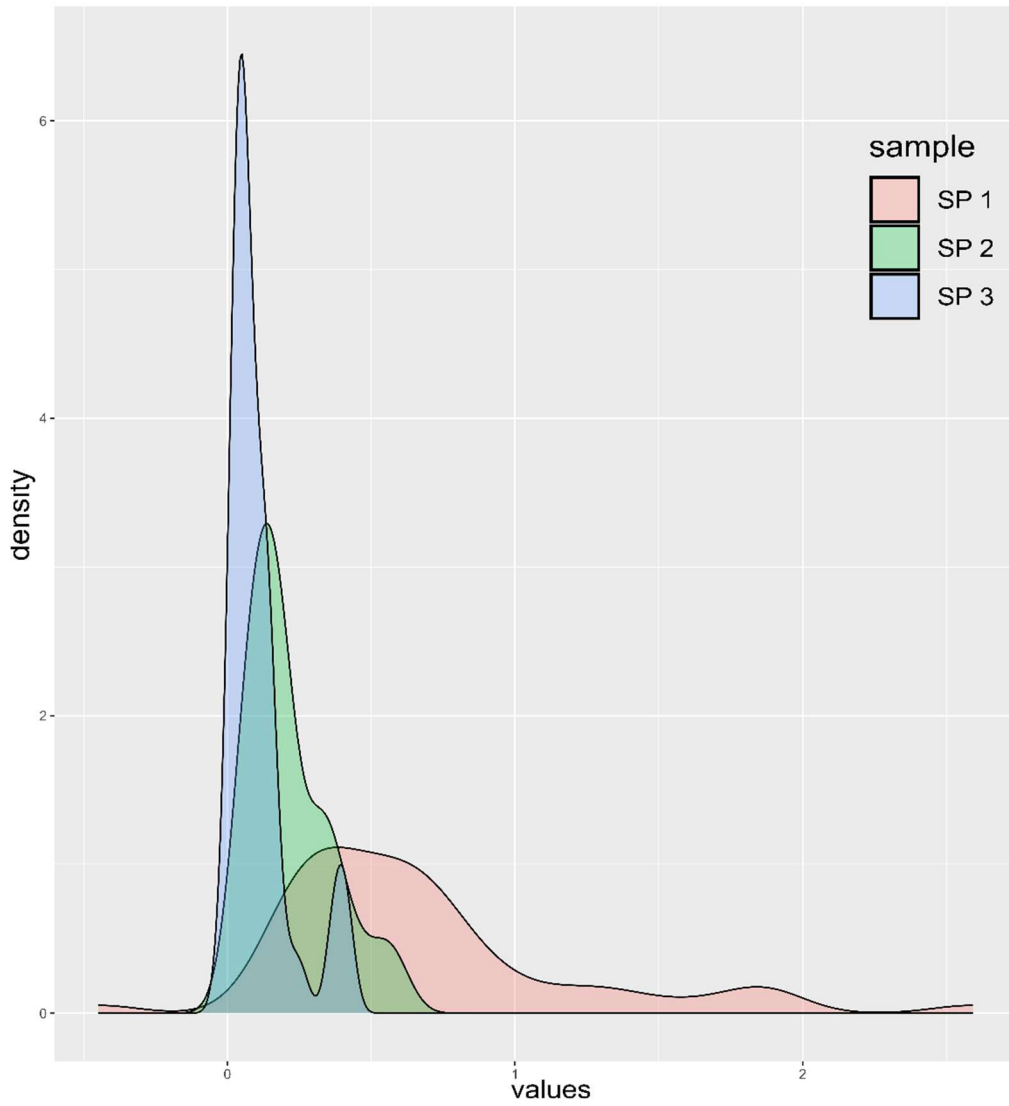

171  
172 *Figure S4. Density plots presenting the distribution of values for each sample applying the RI-URBANS DTT SOP.*  
173  
174  
175  
176  
177  
178  
179



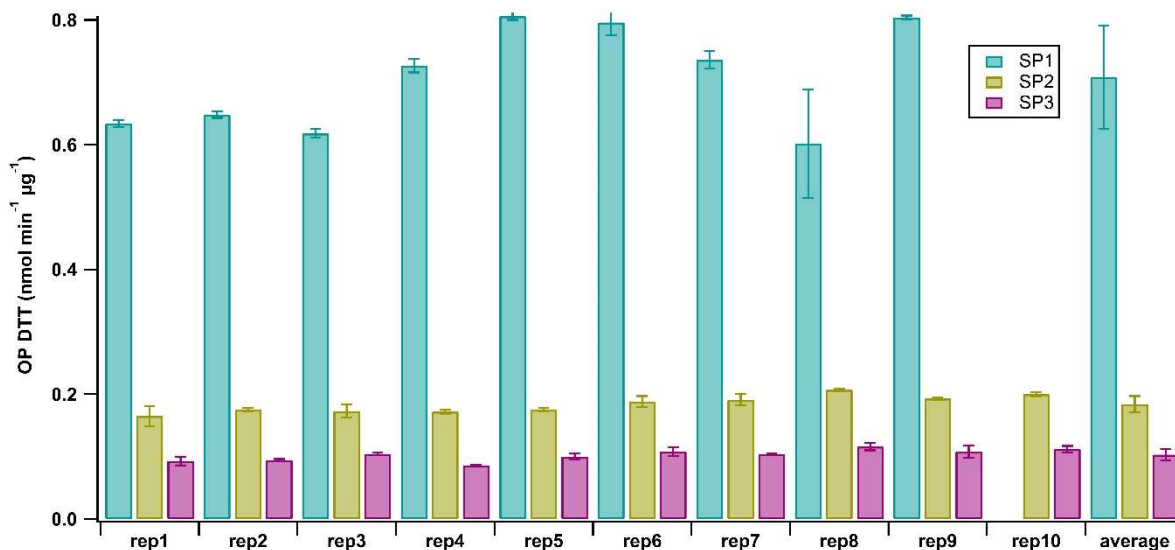

180

181 *Figure S5. Homogeneity test results (average and standard deviation) obtained from the measurements of each*  
 182 *sample replicates (n=10 for each sample). SP1 = 1,4 naphthoquinone solution, SP2 = biomass burning emissions*  
 183 *sample and SP3 = traffic emissions sample.*

184

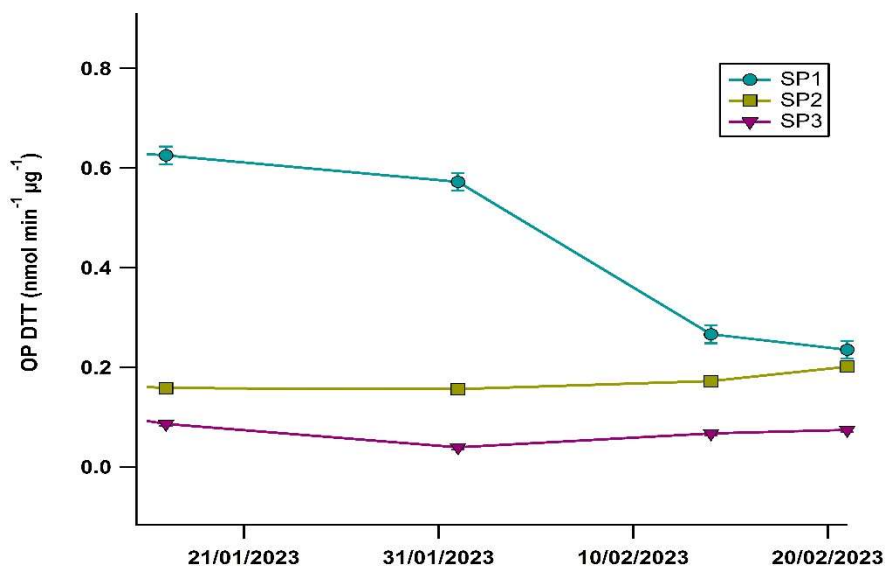

185

186 *Figure S6. Results of the OP DTT of each sample (average and standard deviation obtained from the*  
 187 *homogenization test) over time following the simplified RI-URBANS DTT SOP. The analyses were performed by the*  
 188 *ILC organiser.*

189

190

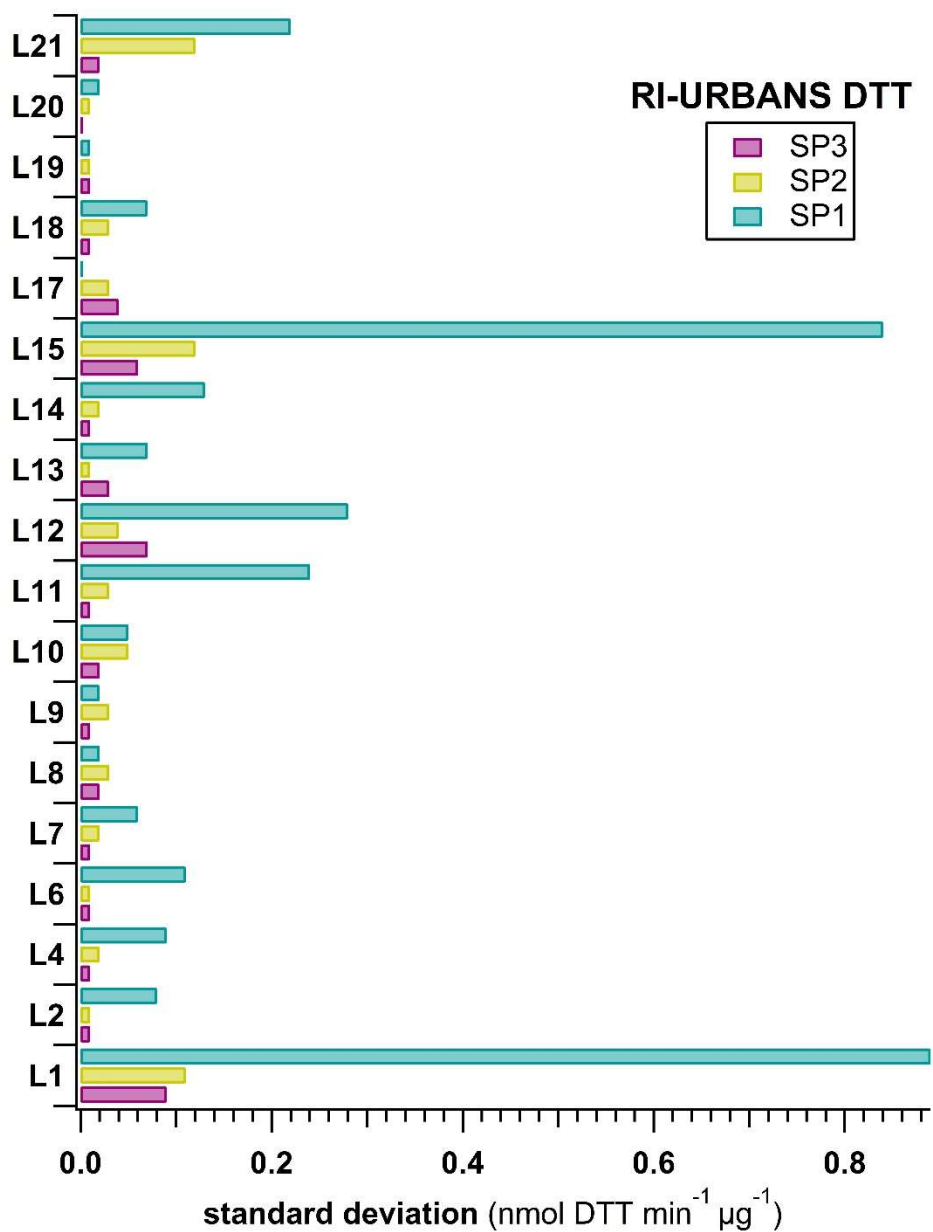

191

192 *Figure S7. Standard deviation on the replicates reported for each test sample using the RI-URBANS DTT SOP,*  
 193 *grouped by participant reference number.*

194

195

196 *Table S1. The average and standard deviation (in nmol min<sup>-1</sup> μg<sup>-1</sup>) of each test sample obtained from replicates*  
 197 *of each participant applying the RI-URBANS DTT SOP*

| <b>Participant</b> | <b>SP1_Mean</b> | <b>SP1_SD</b> | <b>SP2_Mean</b> | <b>SP2_SD</b> | <b>SP3_Mean</b> | <b>SP3_SD</b> |
|--------------------|-----------------|---------------|-----------------|---------------|-----------------|---------------|
| <b>L1</b>          | 0.468           | 0.888         | 0.303           | 0.112         | 0.363           | 0.092         |
| <b>L2</b>          | 0.691           | 0.078         | 0.172           | 0.012         | 0.106           | 0.006         |
| <b>L3</b>          | --              | --            | --              | --            | --              | --            |
| <b>L4</b>          | 0.373           | 0.087         | 0.161           | 0.019         | 0.061           | 0.006         |
| <b>L5</b>          | --              | --            | --              | --            | --              | --            |
| <b>L6</b>          | 0.603           | 0.109         | 0.338           | 0.013         | 0.152           | 0.014         |
| <b>L7</b>          | 0.223           | 0.059         | 0.078           | 0.019         | 0.031           | 0.011         |
| <b>L8</b>          | 0.452           | 0.020         | 0.177           | 0.032         | 0.066           | 0.016         |
| <b>L9</b>          | 0.267           | 0.016         | 0.079           | 0.026         | 0.047           | 0.008         |
| <b>L10</b>         | 0.770           | 0.050         | 0.464           | 0.053         | 0.134           | 0.016         |
| <b>L11</b>         | 0.986           | 0.238         | 0.571           | 0.029         | 0.379           | 0.014         |
| <b>L12</b>         | 0.404           | 0.281         | 0.118           | 0.037         | 0.048           | 0.073         |
| <b>L13</b>         | 0.561           | 0.071         | 0.207           | 0.009         | 0.065           | 0.030         |
| <b>L14</b>         | 0.402           | 0.128         | 0.345           | 0.020         | 0.017           | 0.014         |
| <b>L15</b>         | 1.714           | 0.844         | 0.132           | 0.123         | 0.079           | 0.063         |
| <b>L16</b>         | --              | --            | --              | --            | --              | --            |
| <b>L17</b>         | 1.867           | 0.005         | 0.078           | 0.030         | 0.173           | 0.036         |
| <b>L18</b>         | 0.405           | 0.071         | 0.190           | 0.032         | 0.042           | 0.008         |
| <b>L19</b>         | 0.648           | 0.013         | 0.070           | 0.008         | 0.098           | 0.006         |
| <b>L20</b>         | 0.232           | 0.016         | 0.137           | 0.008         | 0.048           | 0.003         |
| <b>L21</b>         | 1.191           | 0.222         | 0.268           | 0.117         | 0.030           | 0.019         |

198

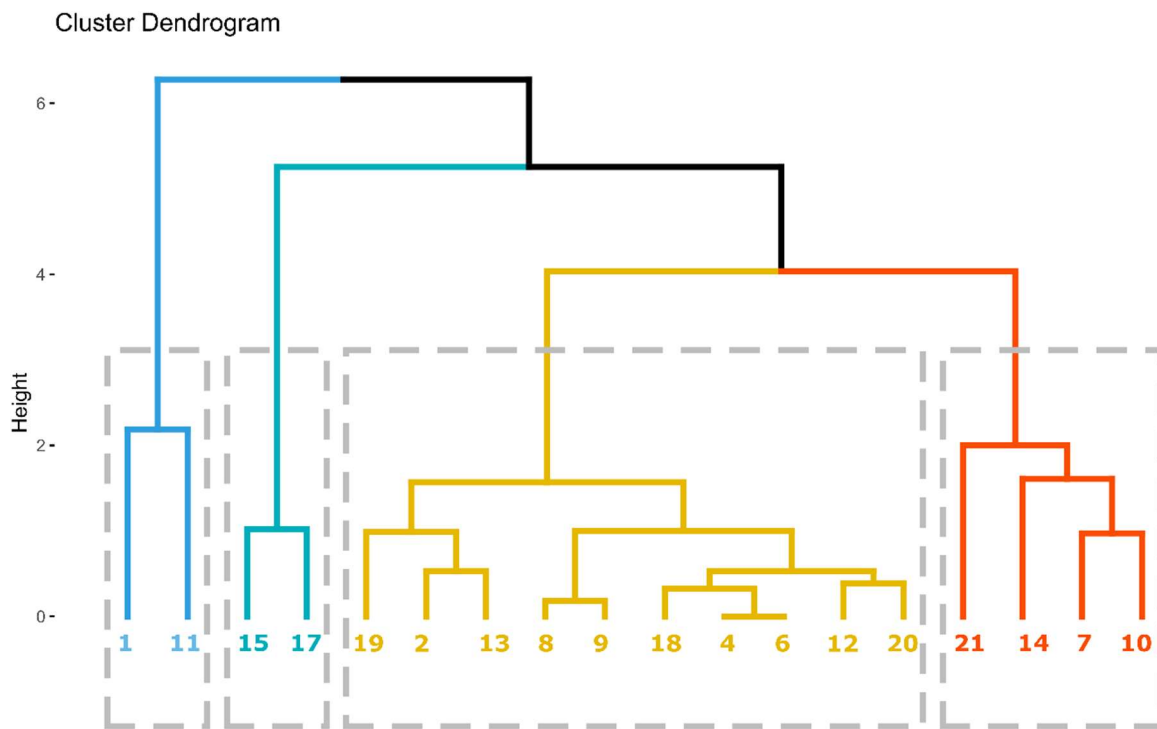

199  
 200 *Figure S8. Dendrogram of the hierarchical cluster analysis using the Ward method and applied to the results*  
 201 *reported from the simplified OP DTT RI-URBANS SOP.*

202  
 203  
 204 *Table S2. Variables and observations included in the multiple linear models used in this study. Delivery and*  
 205 *analysis time variables are not described here*

| Sample | Instrument          | Protocols                        |                                               |
|--------|---------------------|----------------------------------|-----------------------------------------------|
|        |                     | <i>M1 = RI-URBANS DTT</i><br>(n) | <i>M2 = RI-URBANS DTT + "home" DTT</i><br>(n) |
| SP1    | <i>Cuvette</i>      | 27                               | 36                                            |
|        | <i>Plate reader</i> | 24                               | 41                                            |
|        | <i>LWCC</i>         | 3                                | 11                                            |
| SP2    | <i>Cuvette</i>      | 27                               | 39                                            |
|        | <i>Plate reader</i> | 24                               | 44                                            |
|        | <i>LWCC</i>         | 3                                | 11                                            |
| SP3    | <i>Cuvette</i>      | 27                               | 39                                            |
|        | <i>Plate reader</i> | 24                               | 44                                            |
|        | <i>LWCC</i>         | 3                                | 12                                            |

206  
 207  
 208  
 209  
 210  
 211  
 212  
 213

214 *Table S3. Average and standard deviation (in nmol min<sup>-1</sup> μg<sup>-1</sup>) of each test sample obtained from replicates of*  
 215 *each participant applying DTT-“home” protocols*  
 216

| <b>Laboratory</b> | <b>SP1_Mean</b> | <b>SP1_SD</b> | <b>SP2_Mean</b> | <b>SP2_SD</b> | <b>SP3_Mean</b> | <b>SP3_SD</b> |
|-------------------|-----------------|---------------|-----------------|---------------|-----------------|---------------|
| <b>L1</b>         | 1.934           | 0.300         | 0.141           | 0.026         | 0.022           | 0.012         |
| <b>L2</b>         | 0.702           | 0.064         | 0.206           | 0.014         | 0.102           | 0.014         |
| <b>L3</b>         | 0.027           | 0.000         | 0.003           | 0.001         | 0.002           | 0.000         |
| <b>L4</b>         | --              | --            | --              | --            | --              | --            |
| <b>L5</b>         | --              | --            | --              | --            | --              | --            |
| <b>L6</b>         | 0.350           | 0.003         | 0.269           | 0.002         | 0.088           | 0.001         |
| <b>L7</b>         | 0.721           | 0.208         | 0.721           | 0.092         | 0.040           | 0.001         |
| <b>L8</b>         | --              | --            | --              | --            | --              | --            |
| <b>L9</b>         | --              | --            | --              | --            | --              | --            |
| <b>L10</b>        | 0.885           | 0.015         | 0.519           | 0.022         | 0.036           | 0.004         |
| <b>L11</b>        | 1.747           | 0.232         | 0.239           | 0.041         | 0.055           | 0.015         |
| <b>L12</b>        | 1.327           | 0.219         | 0.156           | 0.012         | 0.110           | 0.009         |
| <b>L13</b>        | 1.452           | 0.092         | 0.078           | 0.002         | 0.016           | 0.001         |
| <b>L14</b>        | --              | --            | 0.123           | 0.006         | 0.059           | 0.008         |
| <b>L15</b>        | --              | --            | --              | --            | --              | --            |
| <b>L16</b>        | --              | --            | --              | --            | --              | --            |
| <b>L17</b>        | --              | --            | 0.081           | 0.023         | 0.023           | 0.009         |
| <b>L18</b>        | --              | --            | --              | --            | --              | --            |
| <b>L19</b>        | 3.677           | 0.346         | 0.501           | 0.036         | 0.247           | 0.024         |
| <b>L20</b>        | 0.814           | 0.077         | 0.111           | 0.008         | 0.055           | 0.005         |
| <b>L21</b>        | --              | --            | --              | --            | --              | --            |

217

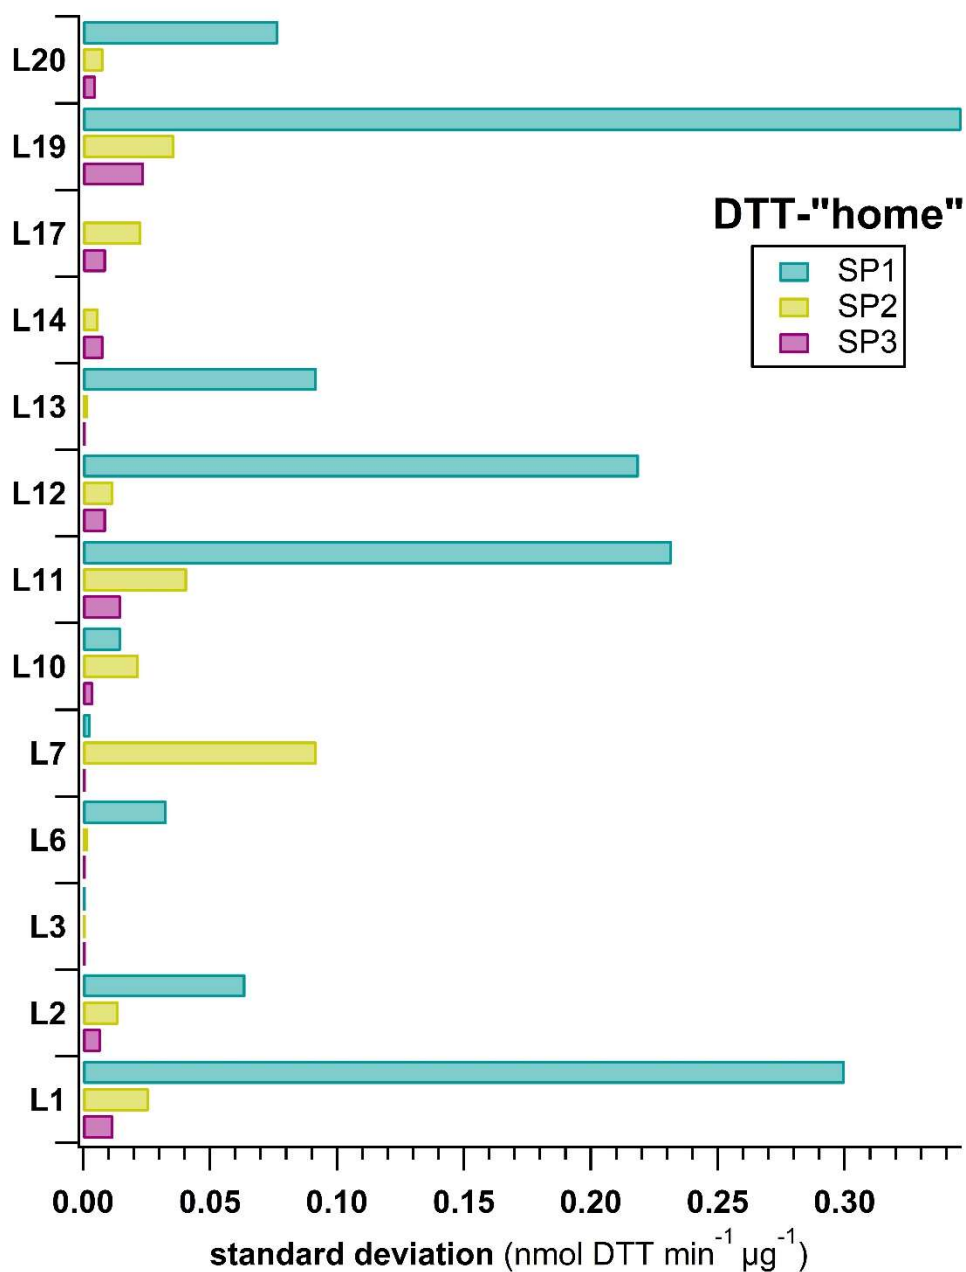

218  
 219 *Figure S9. Standard deviation on the replicates reported for each test sample using the DTT-"home" protocols,*  
 220 *grouped by participant reference number.*  
 221  
 222  
 223

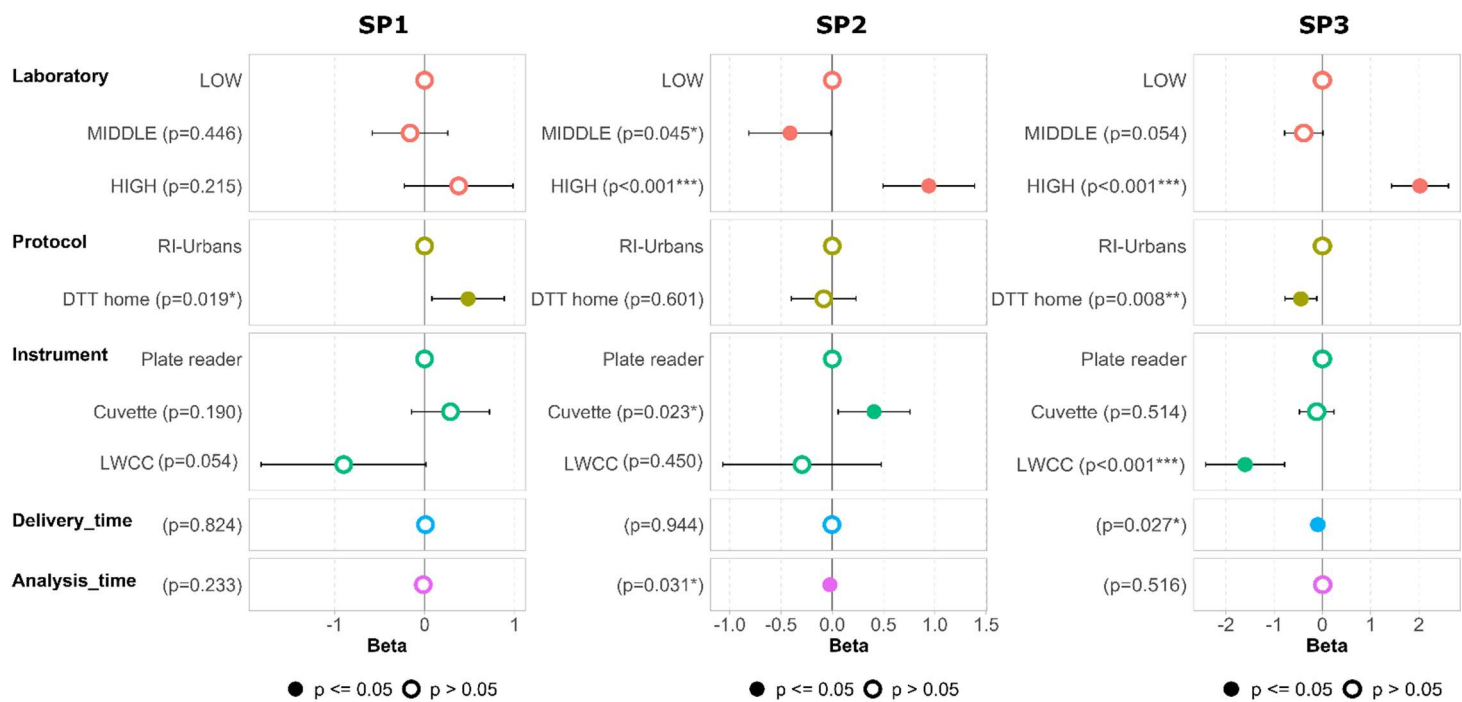

224  
225

226 Figure S10. Associations (betas in  $\text{nmol min}^{-1} \mu\text{g}^{-1}$ ) between OP DTT values for SP1, SP2 and SP3 for categorical  
 227 classification considering the performances of each laboratory grouped into low ( $0 < |z| < 2$ ), middle ( $2 < |z| < 3$ ) and high  
 228 ( $|z| > 3$ ) z-scores. The model includes the different parameters of the intercomparison, including the DTT protocol used,  
 229 the instrument used and the delivery and analysis time obtained by applying a multiple linear regression model.  
 230

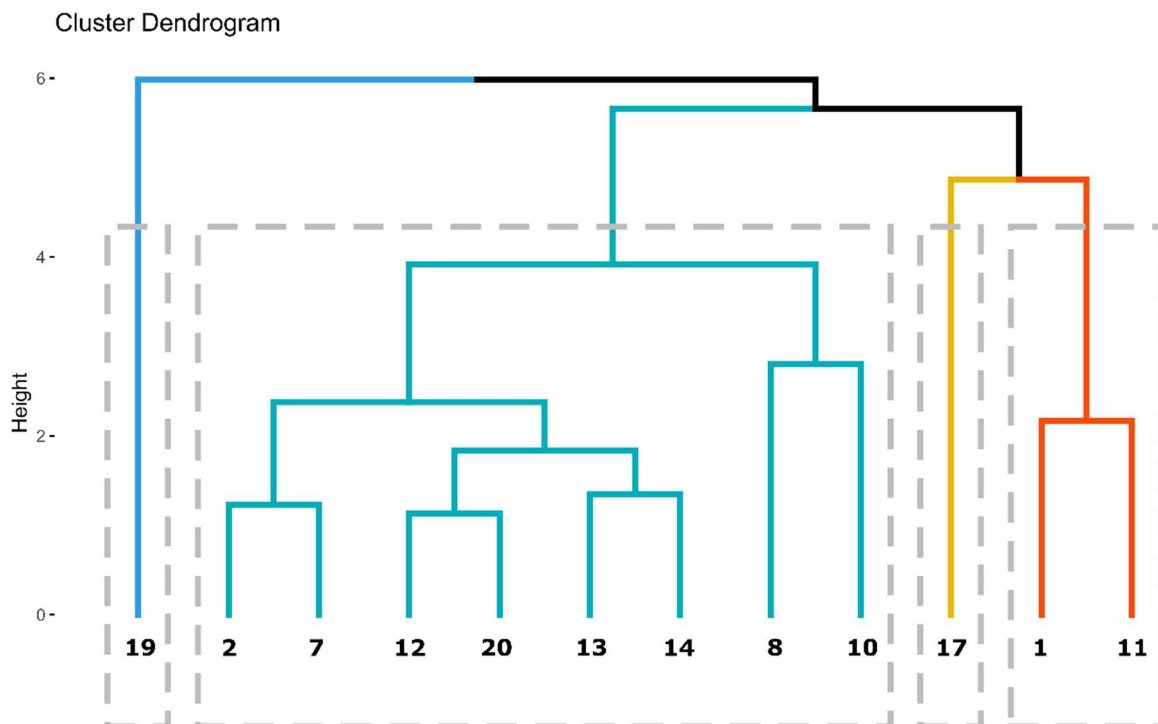

231  
 232 Figure S11. Dendrogram of hierarchical cluster analysis using the results from the groups reporting results of the  
 233 simplified OP DTT RI-URBANS and DTT "home" protocols (include only the participants that reported results for  
 234 the two protocols)  
 235

236  
237

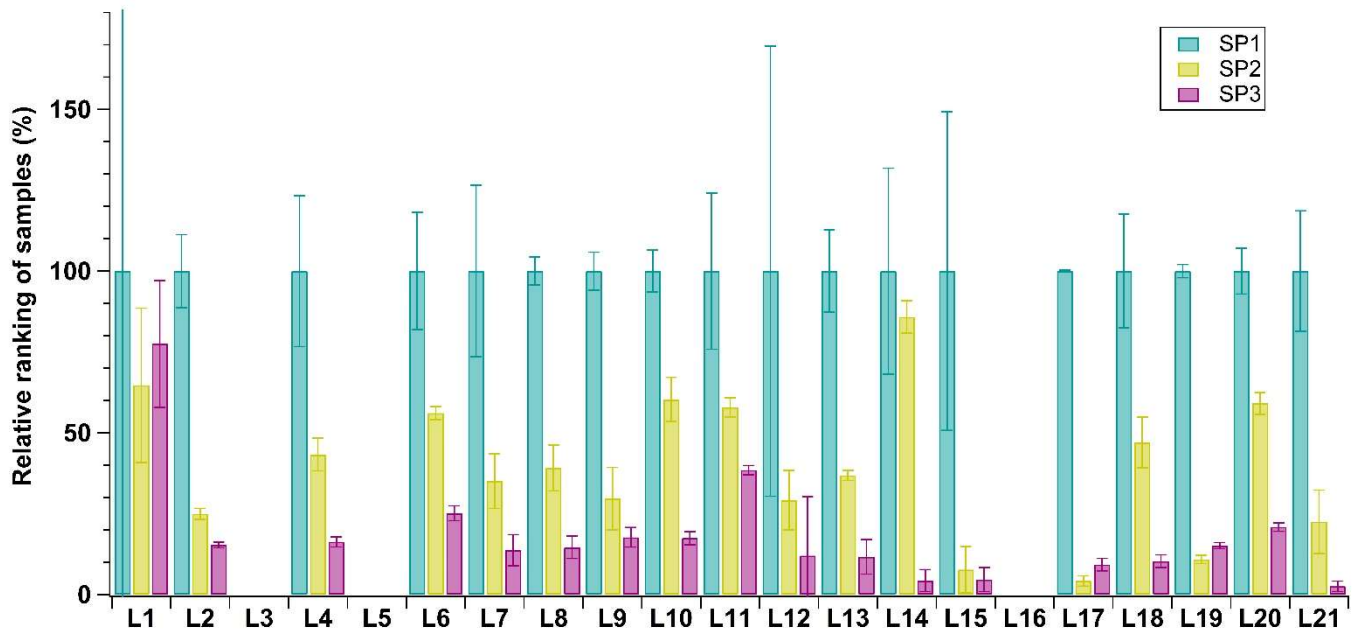

238  
239 *Figure S12. Relative average ranking and standard deviation of the samples evaluated in this ILC, considering*  
240 *SP1 as the reference one (100%).*

241
